# Supplementary material for: Neurobiological substrates of animal personality and cognition in a nonhuman primate (Microcebus murinus)
Source: PubMed Central journal article supplement (PMC7507526; doi:10.1002/brb3.1752), 2020-07-18
Supplement: BRB3-10-e01752-s001.pdf [file BRB3-10-e01752-s001.pdf]

**Tab. S1: Behavioral performance variables for each tested animal.** The table provides animal-ID, sex, delay between cognitive testing and MRI [years], number of trials to reach the criterion for the PD 80, the PDR 50, and the PDR 50-80, delay between open-field based testing and MRI [years], latency to emergence for the SBE [s], as well as exploration (first principal component from the OF) and neophilia (first principal component from the NO) values.

| <u>Animal ID</u> | <u>Sex</u> | <u>Delay Cognition</u> | <u>PD 80</u> | <u>PDR 50</u> | <u>PDR 50-80</u> | <u>Delay OF</u> | <u>SBE</u> | <u>OF 1</u> | <u>NO 1</u> |
|------------------|------------|------------------------|--------------|---------------|------------------|-----------------|------------|-------------|-------------|
| 1                | f          | 1.97                   | 780          | 1680          | 120              | 0.82            | 74         | 1.31        | 2.35        |
| 2                | f          | 2.26                   | 270          | 150           | 150              | 1.05            | 82         | 0.47        | 2.45        |
| 3                | f          | 2.44                   | 360          | 600           | 360              | 1.36            | 197        | 0.46        | -0.19       |
| 4                | f          | 1.88                   | 120          | 229           | 90               | 0.90            | 42         | 0.31        | -1.33       |
| 5                | f          | 1.98                   | 180          | 330           | 60               | 1.11            | 78         | -0.33       | 0.08        |
| 6                | f          | 2.25                   | 210          | 300           | 240              | 1.44            | 87         | 1.47        | 1.31        |
| 7                | f          | 2.69                   | 237          | 148           | 60               | 1.69            | 213        | 1.88        | -1.09       |
| 8                | f          | 2.35                   | 215          | 261           | 120              | 1.53            | 74         | 0.91        | -0.58       |
| 9                | f          | 2.34                   | 191          | 285           | 90               |                 |            |             |             |
| 10               | f          | 2.41                   | 300          | 180           | 150              |                 |            |             |             |
| 11               | f          | 2.29                   | 570          | 769           | 210              |                 |            |             |             |
| 12               | f          | 2.11                   | 180          | 155           | 90               |                 |            |             |             |
| 13               | f          |                        |              |               |                  | 1.40            | 102        | 0.76        | 0.60        |
| 14               | f          |                        |              |               |                  | 1.78            | 900        | -1.20       | 0.18        |
| 15               | f          |                        |              |               |                  | 1.70            | 900        | -1.44       | -0.29       |
| 16               | f          |                        |              |               |                  | 1.27            | 142        | -0.98       | 0.67        |
| 17               | f          |                        |              |               |                  | 1.46            | 878        | 0.66        | 0.39        |
| 18               | f          |                        |              |               |                  | 1.39            | 172        | 0.04        | 0.15        |
| 19               | m          | 3.10                   | 470          | 252           | 90               | 3.61            | 181        | 0.98        | -0.16       |
| 20               | m          | 2.89                   | 381          | 330           | 210              | 3.21            | 53         | -0.41       | -0.77       |
| 21               | m          | 2.46                   | 615          | 265           | 423              | 3.40            | 81         | 0.32        | -0.80       |
| 22               | m          | 2.53                   | 570          | 180           | 240              | 3.40            | 116        | -0.30       | 0.84        |
| 23               | m          | 1.85                   | 150          | 180           | 150              | 3.15            | 575        | 1.39        | -0.13       |
| 24               | m          | 2.21                   | 570          | 270           | 510              | 3.11            | 128        | -1.36       | -0.46       |
| 25               | m          | 2.55                   | 420          | 750           | 270              | 3.21            | 435        | -0.65       | -0.41       |
| 26               | m          | 2.87                   | 240          | 150           | 120              | 3.09            | 89         | -0.71       | -0.50       |
| 27               | m          | 3.38                   | 210          | 272           | 180              | 3.82            | 900        | -2.23       | -0.65       |
| 28               | m          |                        |              |               |                  | 3.09            | 124        | -0.05       | 0.47        |
| 29               | m          |                        |              |               |                  | 2.78            | 32         | 0.02        | -0.11       |
| 30               | m          |                        |              |               |                  | 3.44            | 138        | -0.89       | -1.33       |
| 31               | m          |                        |              |               |                  | 3.59            | 179        | 0.04        | 0.37        |
| 32               | m          |                        |              |               |                  | 2.64            | 28         | 0.95        | 1.62        |
| 33               | m          |                        |              |               |                  | 3.59            | 550        | -0.03       | -1.33       |
| 34               | m          |                        |              |               |                  | 3.86            | 900        | -1.39       | -1.33       |

**Tab. S2: Linear regression estimates for sex-specific regional volume/thickness changes per year (N<sub>♀</sub>=27; N<sub>♂</sub>=32).**

| <b>Analyzed brain region</b> | <b>Females</b> | <b>Males</b> |
|------------------------------|----------------|--------------|
| Caudate nucleus (left)       | -0.0373        | -0.0189      |
| Caudate nucleus (right)      | -0.0535        | -0.0272      |
| Caudate nucleus (average)    | -0.0454        | -0.0230      |
| Hippocampus (left)           | 0.0058         | 0.1940       |
| Hippocampus (right)          | 0.0206         | 0.0119       |
| Hippocampus (average)        | 0.0132         | 0.1030       |
| Amygdala (left)              | -0.0178        | -0.0324      |
| Amygdala (right)             | -0.0203        | -0.0039      |
| Amygdala (average)           | -0.0191        | -0.0181      |
| Intracranial                 | 0.3562         | -0.5483      |
| Thalamus                     | -0.0664        | -0.1568      |
| Splenium                     | -0.0527        | -0.0498      |
| Septum                       | -0.0111        | 0.0119       |
| cxSplenum                    | -0.0130        | -0.0181      |
| cx6                          | -0.0136        | -0.0170      |
| cx4                          | 0.0002         | -0.0104      |
| cxFrontal                    | -0.0067        | -0.0137      |
| cx24                         | -0.0132        | -0.0159      |
| cx23                         | -0.0089        | -0.0072      |
| cxCingulum                   | -0.0110        | -0.0115      |
| cx5                          | -0.0091        | -0.0141      |
| cx7                          | -0.0102        | -0.0145      |
| cxParietal                   | -0.0097        | -0.0143      |
| cx21                         | -0.0130        | -0.0218      |
| cx22                         | -0.0061        | -0.0016      |
| cx28                         | 0.0029         | 0.0015       |
| cxTemporal                   | -0.0054        | -0.0073      |
| cx17                         | -0.0068        | -0.0211      |
| cx18                         | -0.0115        | -0.0255      |
| cxOccipital                  | -0.0092        | -0.0233      |
| cxTotalAverage               | -0.0084        | -0.0140      |
| cx13                         | -0.0064        | -0.0183      |

**Tab. S3: Full overview of Spearman's correlation analyses for the cognitive experiments (N=21); delay-corrected and normalized data.** Significance levels (code: \*p≤0.05; \*\*p≤0.01; n.s.= no significance), Spearman's correlation coefficients ( $r_{SP}$ ) and p-values ( $p_{SP}$ ) are presented for: PD 80, PDR 50, PDR 50-80.

| Analyzed brain region     | <u>PD 80</u> |          |         | <u>PDR 50</u> |          |         | <u>PDR 50-80</u> |          |         |
|---------------------------|--------------|----------|---------|---------------|----------|---------|------------------|----------|---------|
|                           | $r_{SP}$     | $p_{SP}$ | Signif. | $r_{SP}$      | $p_{SP}$ | Signif. | $r_{SP}$         | $p_{SP}$ | Signif. |
| Caudate nucleus (left)    | -0.3103      | 0.1709   | n.s.    | 0.1418        | 0.5397   | n.s.    | -0.1700          | 0.4613   | n.s.    |
| Caudate nucleus (right)   | -0.2069      | 0.3682   | n.s.    | 0.1399        | 0.5453   | n.s.    | -0.3563          | 0.1129   | n.s.    |
| Caudate nucleus (average) | -0.2297      | 0.3166   | n.s.    | 0.1783        | 0.4394   | n.s.    | -0.3269          | 0.1480   | n.s.    |
| Hippocampus (left)        | -0.4424      | 0.0446   | *       | -0.4053       | 0.0683   | n.s.    | -0.1399          | 0.5452   | n.s.    |
| Hippocampus (right)       | -0.2245      | 0.3280   | n.s.    | 0.0950        | 0.6821   | n.s.    | 0.1484           | 0.5208   | n.s.    |
| Hippocampus (average)     | -0.3754      | 0.0935   | n.s.    | -0.1926       | 0.4030   | n.s.    | -0.0432          | 0.8527   | n.s.    |
| Amygdala (left)           | 0.0195       | 0.9331   | n.s.    | -0.0696       | 0.7643   | n.s.    | 0.0379           | 0.8704   | n.s.    |
| Amygdala (right)          | -0.0950      | 0.6821   | n.s.    | -0.2062       | 0.3697   | n.s.    | -0.3151          | 0.1641   | n.s.    |
| Amygdala (average)        | 0.0085       | 0.9710   | n.s.    | -0.1340       | 0.5625   | n.s.    | -0.0948          | 0.6827   | n.s.    |
| Intracranial              | -0.1620      | 0.4829   | n.s.    | -0.2902       | 0.2020   | n.s.    | -0.1229          | 0.5955   | n.s.    |
| Thalamus                  | -0.2219      | 0.3338   | n.s.    | -0.6389       | 0.0018   | **      | -0.0948          | 0.6827   | n.s.    |
| Splenium                  | -0.1464      | 0.5266   | n.s.    | -0.2238       | 0.3294   | n.s.    | -0.1890          | 0.4120   | n.s.    |
| Septum                    | 0.0390       | 0.8666   | n.s.    | 0.3533        | 0.1162   | n.s.    | -0.0150          | 0.9484   | n.s.    |
| cxSplenium                | -0.1269      | 0.5837   | n.s.    | 0.0481        | 0.8358   | n.s.    | -0.0445          | 0.8482   | n.s.    |
| cx6                       | -0.2115      | 0.3575   | n.s.    | 0.0878        | 0.7050   | n.s.    | -0.0909          | 0.6952   | n.s.    |
| cx4                       | 0.1034       | 0.6554   | n.s.    | 0.4079        | 0.0664   | n.s.    | 0.0739           | 0.7503   | n.s.    |
| cxFrontal                 | -0.0631      | 0.7858   | n.s.    | 0.2902        | 0.2020   | n.s.    | -0.0072          | 0.9753   | n.s.    |
| cx24                      | 0.2030       | 0.3775   | n.s.    | 0.0696        | 0.7643   | n.s.    | 0.4949           | 0.0225   | *       |
| cx23                      | 0.0202       | 0.9308   | n.s.    | -0.2212       | 0.3352   | n.s.    | -0.0824          | 0.7226   | n.s.    |
| cxCingulum                | 0.1516       | 0.5118   | n.s.    | -0.0573       | 0.8053   | n.s.    | 0.2962           | 0.1924   | n.s.    |
| cx5                       | 0.2095       | 0.3621   | n.s.    | 0.1692        | 0.4635   | n.s.    | 0.0974           | 0.6744   | n.s.    |
| cx7                       | 0.0651       | 0.7793   | n.s.    | -0.0605       | 0.7944   | n.s.    | 0.1040           | 0.6538   | n.s.    |
| cxParietal                | 0.1034       | 0.6554   | n.s.    | 0.0481        | 0.8358   | n.s.    | 0.0484           | 0.8350   | n.s.    |
| cx21                      | 0.1646       | 0.4758   | n.s.    | 0.3416        | 0.1297   | n.s.    | 0.1399           | 0.5452   | n.s.    |
| cx22                      | 0.3943       | 0.0770   | n.s.    | 0.3643        | 0.1044   | n.s.    | 0.3635           | 0.1053   | n.s.    |
| cx28                      | 0.3513       | 0.1184   | n.s.    | -0.0696       | 0.7643   | n.s.    | 0.1020           | 0.6600   | n.s.    |
| cxTemporal                | 0.4522       | 0.0396   | *       | 0.3383        | 0.1336   | n.s.    | 0.3119           | 0.1687   | n.s.    |
| cx17                      | 0.0937       | 0.6863   | n.s.    | 0.2928        | 0.1978   | n.s.    | 0.0909           | 0.6952   | n.s.    |
| cx18                      | -0.0494      | 0.8314   | n.s.    | 0.1165        | 0.6152   | n.s.    | -0.0889          | 0.7015   | n.s.    |
| cxOccipital               | -0.0553      | 0.8118   | n.s.    | 0.2674        | 0.2413   | n.s.    | 0.0052           | 0.9820   | n.s.    |
| cxTotalAverage            | 0.0781       | 0.7366   | n.s.    | 0.2082        | 0.3651   | n.s.    | 0.1458           | 0.5283   | n.s.    |
| cx13                      | 0.0306       | 0.8953   | n.s.    | 0.0586        | 0.8009   | n.s.    | -0.0582          | 0.8022   | n.s.    |

**Tab. S4: Full overview of Spearman's correlation analyses for the open-field based experiments (N=30); delay-corrected and normalized data.** Significance levels (code: \* $p \leq 0.05$ ; \*\* $p \leq 0.01$ ; n.s.= no significance), Spearman's correlation coefficients ( $r_{SP}$ ) and p-values ( $p_{SP}$ ) are presented for: OF 1, NO 1, SBE.

| Analyzed brain region     | <u>SBE</u> |          |         | <u>OF 1</u> |          |         | <u>NO 1</u> |          |         |
|---------------------------|------------|----------|---------|-------------|----------|---------|-------------|----------|---------|
|                           | $r_{SP}$   | $p_{SP}$ | Signif. | $r_{SP}$    | $p_{SP}$ | Signif. | $r_{SP}$    | $p_{SP}$ | Signif. |
| Caudate nucleus (left)    | -0.2312    | 0.2190   | n.s.    | -0.0914     | 0.6296   | n.s.    | -0.3998     | 0.0286   | *       |
| Caudate nucleus (right)   | -0.1022    | 0.5909   | n.s.    | -0.0314     | 0.8694   | n.s.    | -0.2080     | 0.2700   | n.s.    |
| Caudate nucleus (average) | -0.1831    | 0.3328   | n.s.    | -0.0848     | 0.6550   | n.s.    | -0.3218     | 0.0829   | n.s.    |
| Hippocampus (left)        | -0.1450    | 0.4446   | n.s.    | -0.1168     | 0.5373   | n.s.    | -0.0399     | 0.8343   | n.s.    |
| Hippocampus (right)       | -0.2539    | 0.1757   | n.s.    | -0.1106     | 0.5593   | n.s.    | -0.0002     | 0.9991   | n.s.    |
| Hippocampus (average)     | -0.2063    | 0.2742   | n.s.    | -0.0861     | 0.6499   | n.s.    | 0.0029      | 0.9879   | n.s.    |
| Amygdala (left)           | -0.4907    | 0.0059   | **      | 0.3112      | 0.0944   | n.s.    | 0.2114      | 0.2622   | n.s.    |
| Amygdala (right)          | -0.3479    | 0.0596   | n.s.    | 0.1800      | 0.3398   | n.s.    | 0.0392      | 0.8371   | n.s.    |
| Amygdala (average)        | -0.4769    | 0.0077   | **      | 0.2836      | 0.1287   | n.s.    | 0.1394      | 0.4625   | n.s.    |
| Intracranial              | 0.2154     | 0.2530   | n.s.    | 0.1479      | 0.4336   | n.s.    | -0.0027     | 0.9888   | n.s.    |
| Thalamus                  | -0.2622    | 0.1616   | n.s.    | 0.1030      | 0.5867   | n.s.    | -0.0608     | 0.7496   | n.s.    |
| Splenium                  | -0.1060    | 0.5771   | n.s.    | 0.1519      | 0.4212   | n.s.    | -0.1882     | 0.3193   | n.s.    |
| Septum                    | 0.0846     | 0.6565   | n.s.    | 0.0576      | 0.7618   | n.s.    | 0.3679      | 0.0455   | *       |
| cxSplenium                | -0.0976    | 0.6080   | n.s.    | 0.0331      | 0.8620   | n.s.    | -0.2087     | 0.2684   | n.s.    |
| cx6                       | -0.1913    | 0.3111   | n.s.    | -0.4652     | 0.0103   | *       | -0.0891     | 0.6397   | n.s.    |
| cx4                       | -0.1247    | 0.5113   | n.s.    | -0.2538     | 0.1753   | n.s.    | -0.0849     | 0.6557   | n.s.    |
| cxFrontal                 | -0.1924    | 0.3083   | n.s.    | -0.3740     | 0.0425   | *       | -0.1258     | 0.5076   | n.s.    |
| cx24                      | 0.1000     | 0.5990   | n.s.    | -0.4661     | 0.0101   | *       | -0.3508     | 0.0574   | n.s.    |
| cx23                      | -0.1071    | 0.5731   | n.s.    | 0.0269      | 0.8879   | n.s.    | 0.0220      | 0.9079   | n.s.    |
| cxCingulum                | 0.0552     | 0.7719   | n.s.    | -0.3103     | 0.0954   | n.s.    | -0.2223     | 0.2378   | n.s.    |
| cx5                       | -0.2853    | 0.1264   | n.s.    | -0.2369     | 0.2066   | n.s.    | -0.1330     | 0.4837   | n.s.    |
| cx7                       | -0.1091    | 0.5659   | n.s.    | -0.4082     | 0.0260   | *       | -0.1822     | 0.3353   | n.s.    |
| cxParietal                | -0.2348    | 0.2117   | n.s.    | -0.3295     | 0.0759   | n.s.    | -0.1327     | 0.4844   | n.s.    |
| cx21                      | -0.1218    | 0.5213   | n.s.    | -0.1706     | 0.3657   | n.s.    | -0.1243     | 0.5129   | n.s.    |
| cx22                      | 0.0272     | 0.8867   | n.s.    | -0.0661     | 0.7279   | n.s.    | -0.0987     | 0.6040   | n.s.    |
| cx28                      | -0.2666    | 0.1544   | n.s.    | 0.0665      | 0.7261   | n.s.    | -0.0808     | 0.6711   | n.s.    |
| cxTemporal                | -0.1708    | 0.3667   | n.s.    | -0.0407     | 0.8307   | n.s.    | -0.1196     | 0.5290   | n.s.    |
| cx17                      | -0.1506    | 0.4271   | n.s.    | -0.2245     | 0.2321   | n.s.    | -0.0510     | 0.7890   | n.s.    |
| cx18                      | -0.2366    | 0.2082   | n.s.    | -0.1488     | 0.4309   | n.s.    | -0.2608     | 0.1639   | n.s.    |
| cxOccipital               | -0.2348    | 0.2117   | n.s.    | -0.1533     | 0.4171   | n.s.    | -0.2082     | 0.2695   | n.s.    |
| cxTotalAverage            | -0.1746    | 0.3560   | n.s.    | -0.3366     | 0.0695   | n.s.    | -0.2218     | 0.2388   | n.s.    |
| cx13                      | -0.1223    | 0.5197   | n.s.    | 0.0576      | 0.7618   | n.s.    | -0.0296     | 0.8765   | n.s.    |

**Tab. S5: Full overview of Spearman's correlation analyses for the cognitive experiments (N=21); non-corrected, normalized raw data.** Significance levels (code: \* $p \leq 0.05$ ; \*\* $p \leq 0.01$ ; n.s.= no significance), Spearman's correlation coefficients ( $r_{SP}$ ) and p-values ( $p_{SP}$ ) are presented for: PD 80, PDR 50, PDR 50-80.

| Analyzed brain region     | <u>PD 80</u> |          |         | <u>PDR 50</u> |          |         | <u>PDR 50-80</u> |          |         |
|---------------------------|--------------|----------|---------|---------------|----------|---------|------------------|----------|---------|
|                           | $r_{SP}$     | $p_{SP}$ | Signif. | $r_{SP}$      | $p_{SP}$ | Signif. | $r_{SP}$         | $p_{SP}$ | Signif. |
| Caudate nucleus (left)    | -0.3071      | 0.1757   | n.s.    | 0.1711        | 0.4583   | n.s.    | -0.1582          | 0.4933   | n.s.    |
| Caudate nucleus (right)   | -0.1438      | 0.5341   | n.s.    | 0.1861        | 0.4193   | n.s.    | -0.3367          | 0.1356   | n.s.    |
| Caudate nucleus (average) | -0.2433      | 0.2878   | n.s.    | 0.1509        | 0.5137   | n.s.    | -0.2570          | 0.2608   | n.s.    |
| Hippocampus (left)        | -0.3221      | 0.1545   | n.s.    | -0.3897       | 0.0807   | n.s.    | -0.0347          | 0.8815   | n.s.    |
| Hippocampus (right)       | -0.2459      | 0.2825   | n.s.    | 0.0859        | 0.7113   | n.s.    | 0.1281           | 0.5799   | n.s.    |
| Hippocampus (average)     | -0.3227      | 0.1536   | n.s.    | -0.1978       | 0.3901   | n.s.    | 0.0327           | 0.8881   | n.s.    |
| Amygdala (left)           | 0.0241       | 0.9175   | n.s.    | -0.0833       | 0.7197   | n.s.    | 0.0314           | 0.8926   | n.s.    |
| Amygdala (right)          | -0.0540      | 0.8162   | n.s.    | -0.1984       | 0.3885   | n.s.    | -0.2779          | 0.2226   | n.s.    |
| Amygdala (average)        | 0.0085       | 0.9710   | n.s.    | -0.1340       | 0.5625   | n.s.    | -0.0948          | 0.6827   | n.s.    |
| Intracranial              | -0.1971      | 0.3917   | n.s.    | -0.3006       | 0.1855   | n.s.    | -0.1863          | 0.4187   | n.s.    |
| Thalamus                  | -0.2433      | 0.2878   | n.s.    | -0.6610       | 0.0011   | **      | -0.1301          | 0.5740   | n.s.    |
| Splenium                  | -0.1555      | 0.5009   | n.s.    | -0.2342       | 0.3068   | n.s.    | -0.1929          | 0.4022   | n.s.    |
| Septum                    | 0.0839       | 0.7176   | n.s.    | 0.3149        | 0.1644   | n.s.    | 0.0235           | 0.9193   | n.s.    |
| cxSplenium                | -0.1815      | 0.4310   | n.s.    | 0.0488        | 0.8336   | n.s.    | -0.0889          | 0.7015   | n.s.    |
| cx6                       | -0.2062      | 0.3697   | n.s.    | 0.0735        | 0.7515   | n.s.    | -0.0948          | 0.6827   | n.s.    |
| cx4                       | 0.0384       | 0.8688   | n.s.    | 0.4157        | 0.0609   | n.s.    | 0.0092           | 0.9686   | n.s.    |
| cxFrontal                 | -0.0761      | 0.7429   | n.s.    | 0.2856        | 0.2094   | n.s.    | -0.0320          | 0.8904   | n.s.    |
| cx24                      | 0.1327       | 0.5663   | n.s.    | 0.0742        | 0.7493   | n.s.    | 0.5067           | 0.0191   | *       |
| cx23                      | 0.0104       | 0.9643   | n.s.    | -0.2420       | 0.2905   | n.s.    | -0.0667          | 0.7739   | n.s.    |
| cxCingulum                | 0.1178       | 0.6112   | n.s.    | -0.0455       | 0.8446   | n.s.    | 0.2883           | 0.2050   | n.s.    |
| cx5                       | 0.1809       | 0.4327   | n.s.    | 0.1750        | 0.4480   | n.s.    | 0.0556           | 0.8109   | n.s.    |
| cx7                       | 0.0228       | 0.9220   | n.s.    | -0.0384       | 0.8688   | n.s.    | 0.0490           | 0.8328   | n.s.    |
| cxParietal                | 0.0852       | 0.7134   | n.s.    | 0.0520        | 0.8227   | n.s.    | 0.0628           | 0.7869   | n.s.    |
| cx21                      | 0.0169       | 0.9420   | n.s.    | 0.3591        | 0.1098   | n.s.    | 0.0582           | 0.8022   | n.s.    |
| cx22                      | 0.4105       | 0.0645   | n.s.    | 0.3513        | 0.1184   | n.s.    | 0.3655           | 0.1033   | n.s.    |
| cx28                      | 0.3481       | 0.1220   | n.s.    | -0.0774       | 0.7387   | n.s.    | 0.0843           | 0.7162   | n.s.    |
| cxTemporal                | 0.4255       | 0.0545   | n.s.    | 0.3175        | 0.1608   | n.s.    | 0.2674           | 0.2412   | n.s.    |
| cx17                      | 0.0534       | 0.8183   | n.s.    | 0.3683        | 0.1005   | n.s.    | 0.0517           | 0.8240   | n.s.    |
| cx18                      | -0.1269      | 0.5837   | n.s.    | 0.1646        | 0.4758   | n.s.    | -0.1347          | 0.5605   | n.s.    |
| cxOccipital               | -0.1366      | 0.5548   | n.s.    | 0.3032        | 0.1815   | n.s.    | -0.1419          | 0.5396   | n.s.    |
| cxTotalAverage            | 0.0852       | 0.7134   | n.s.    | 0.2199        | 0.3381   | n.s.    | 0.1170           | 0.6134   | n.s.    |
| cx13                      | 0.0124       | 0.9576   | n.s.    | 0.0442        | 0.8490   | n.s.    | -0.1020          | 0.6600   | n.s.    |

**Tab. S6: Full overview of Spearman's correlation analyses for the open-field based experiments (N=30); non-corrected, normalized raw data.** Significance levels (code: \* $p \leq 0.05$ ; \*\* $p \leq 0.01$ ; n.s.= no significance), Spearman's correlation coefficients ( $r_{SP}$ ) and p-values ( $p_{SP}$ ) are presented for: OF 1, NO 1, SBE.

| Analyzed brain region     | <u>SBE</u> |          |         | <u>OF 1</u> |          |         | <u>NO 1</u> |          |         |
|---------------------------|------------|----------|---------|-------------|----------|---------|-------------|----------|---------|
|                           | $r_{SP}$   | $p_{SP}$ | Signif. | $r_{SP}$    | $p_{SP}$ | Signif. | $r_{SP}$    | $p_{SP}$ | Signif. |
| Caudate nucleus (left)    | -0.2357    | 0.2100   | n.s.    | -0.0808     | 0.6704   | n.s.    | -0.3962     | 0.0302   | *       |
| Caudate nucleus (right)   | -0.1365    | 0.4719   | n.s.    | -0.0456     | 0.8106   | n.s.    | -0.1753     | 0.3542   | n.s.    |
| Caudate nucleus (average) | -0.1896    | 0.3157   | n.s.    | -0.0808     | 0.6704   | n.s.    | -0.3205     | 0.0842   | n.s.    |
| Hippocampus (left)        | -0.1276    | 0.5015   | n.s.    | -0.2196     | 0.2426   | n.s.    | -0.1443     | 0.4467   | n.s.    |
| Hippocampus (right)       | -0.2499    | 0.1829   | n.s.    | -0.1123     | 0.5530   | n.s.    | -0.0071     | 0.9702   | n.s.    |
| Hippocampus (average)     | -0.2263    | 0.2292   | n.s.    | -0.1524     | 0.4198   | n.s.    | -0.0394     | 0.8361   | n.s.    |
| Amygdala (left)           | -0.5023    | 0.0047   | **      | 0.3281      | 0.0771   | n.s.    | 0.2352      | 0.2109   | n.s.    |
| Amygdala (right)          | -0.3537    | 0.0552   | n.s.    | 0.1849      | 0.3266   | n.s.    | 0.0392      | 0.8371   | n.s.    |
| Amygdala (average)        | -0.4960    | 0.0053   | **      | 0.3028      | 0.1040   | n.s.    | 0.1715      | 0.3649   | n.s.    |
| Intracranial              | 0.2294     | 0.2226   | n.s.    | 0.1697      | 0.3683   | n.s.    | 0.0249      | 0.8959   | n.s.    |
| Thalamus                  | -0.2296    | 0.2222   | n.s.    | 0.1648      | 0.3824   | n.s.    | 0.0243      | 0.8987   | n.s.    |
| Splenium                  | -0.1232    | 0.5167   | n.s.    | 0.1782      | 0.3446   | n.s.    | -0.1399     | 0.4610   | n.s.    |
| Septum                    | 0.1138     | 0.5492   | n.s.    | 0.0140      | 0.9420   | n.s.    | 0.3111      | 0.0942   | n.s.    |
| cxSplenum                 | -0.1506    | 0.4271   | n.s.    | 0.0861      | 0.6499   | n.s.    | -0.1290     | 0.4971   | n.s.    |
| cx6                       | -0.2105    | 0.2642   | n.s.    | -0.4331     | 0.0176   | *       | -0.0532     | 0.7800   | n.s.    |
| cx4                       | -0.1207    | 0.5251   | n.s.    | -0.2174     | 0.2475   | n.s.    | -0.0316     | 0.8682   | n.s.    |
| cxFrontal                 | -0.2361    | 0.2091   | n.s.    | -0.2917     | 0.1179   | n.s.    | -0.0007     | 0.9972   | n.s.    |
| cx24                      | 0.0067     | 0.9720   | n.s.    | -0.4198     | 0.0217   | *       | -0.2786     | 0.1360   | n.s.    |
| cx23                      | -0.1466    | 0.4396   | n.s.    | 0.0772      | 0.6842   | n.s.    | 0.0713      | 0.7082   | n.s.    |
| cxCingulum                | 0.0004     | 0.9981   | n.s.    | -0.2347     | 0.2110   | n.s.    | -0.1102     | 0.5619   | n.s.    |
| cx5                       | -0.3270    | 0.0778   | n.s.    | -0.1996     | 0.2891   | n.s.    | -0.0617     | 0.7460   | n.s.    |
| cx7                       | -0.1437    | 0.4488   | n.s.    | -0.3326     | 0.0730   | n.s.    | -0.1332     | 0.4829   | n.s.    |
| cxParietal                | -0.2354    | 0.2104   | n.s.    | -0.2850     | 0.1268   | n.s.    | -0.0882     | 0.6430   | n.s.    |
| cx21                      | -0.2085    | 0.2689   | n.s.    | -0.0830     | 0.6618   | n.s.    | 0.0102      | 0.9571   | n.s.    |
| cx22                      | 0.0078     | 0.9674   | n.s.    | -0.0452     | 0.8124   | n.s.    | -0.0898     | 0.6372   | n.s.    |
| cx28                      | -0.2568    | 0.1707   | n.s.    | 0.0607      | 0.7492   | n.s.    | -0.1029     | 0.5885   | n.s.    |
| cxTemporal                | -0.1980    | 0.2942   | n.s.    | -0.0416     | 0.8270   | n.s.    | -0.0920     | 0.6288   | n.s.    |
| cx17                      | -0.1793    | 0.3431   | n.s.    | -0.1382     | 0.4650   | n.s.    | 0.0383      | 0.8407   | n.s.    |
| cx18                      | -0.3101    | 0.0954   | n.s.    | 0.0274      | 0.8861   | n.s.    | -0.1129     | 0.5524   | n.s.    |
| cxOccipital               | -0.3312    | 0.0738   | n.s.    | -0.0314     | 0.8694   | n.s.    | -0.0428     | 0.8225   | n.s.    |
| cxTotalAverage            | -0.2807    | 0.1330   | n.s.    | -0.2538     | 0.1753   | n.s.    | -0.0929     | 0.6255   | n.s.    |
| cx13                      | -0.1713    | 0.3654   | n.s.    | 0.1293      | 0.4944   | n.s.    | 0.0497      | 0.7944   | n.s.    |
